# Supplementary material
Source: publisher site journal article supplement (https://www.spandidos-publications.com/1714/downloadSupplementary)

Figure S1. Expression levels of OSR1 in breast cancer and normal breast tissue, and its association with prognosis. (A) The mRNA level of OSR1 in breast cancer tissue and adjacent normal breast tissue from the UALCAN web resource (<http://ualcan.path.uab.edu>). (B) The Kaplan-Meier graphs of OSR1 in breast cancer from the online database The Human Protein Atlas (<https://www.proteinatlas.org/>). OSR1, odd-skipped related transcription factor 1; TCGA, The Cancer Genome Atlas.

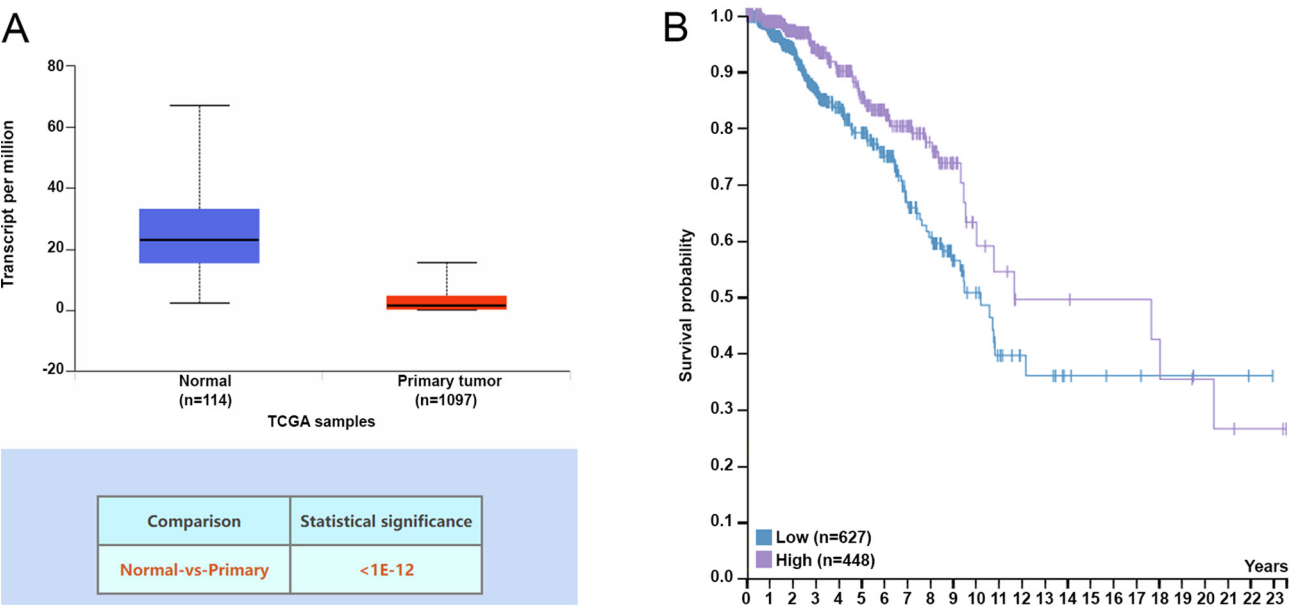

Supplement: Supplementary file 1 [file downloadSupplementary]
